# Supplementary material for: Insights into substrate recognition and specificity for IgG by Endoglycosidase S2
Source: PubMed Central journal article supplement (PMC8354483; doi:10.1371/journal.pcbi.1009103), 2021-07-26
Supplement: pcbi.1009103.s011.pdf [file pcbi.1009103.s011.pdf]

## **Supporting Information**

### **Insights into substrate recognition and specificity for IgG by Endoglycosidase S2.**

### **Short title: Molecular modeling and dynamics simulations of Endoglycosidase S2-Fc complexes.**

Asaminew H. Aytenfisu<sup>1</sup>, Daniel Deredge<sup>1</sup>, Erik H. Klontz<sup>2</sup>, Jonathan Du<sup>2,3</sup>, Eric J. Sundberg<sup>2,3</sup>,  
Alexander D. MacKerell Jr. <sup>1\*</sup>

<sup>1</sup>University of Maryland Computer-Aided Drug Design Center, Department of Pharmaceutical Sciences, School of Pharmacy, University of Maryland, Baltimore, Maryland 21201, United States

<sup>2</sup>Department of Medicine, University of Maryland School of Medicine, Baltimore, Maryland 21201, United States

<sup>3</sup>Department of Biochemistry, Emory University School of Medicine, Atlanta, GA 30322, USA

\*Corresponding Author

E-mail: alex@outerbanks.umaryland.edu; Telephone: +1-410-706-7442.

## Workflow 1: CHARMM code for loop reconstruction

The following lines were used in the CHARMM input.

```
Add loop definition here
set e0 ?ener                                ! system energy
set b 1
label nextloop
block 2
  call 2 sele .not. loop@b end                ! block with loop deleted
  coeff 1 1 0.0
  coeff 1 2 0.0
  coeff 2 2 1.0                               ! self energy with loop excluded
end
energy
block
  clear
end
if ?ener .le. @e0 then                       ! check if energy improves
set loop_id @b                               ! save loop id
set e0 ?ener                                 ! update energy
endif
incr b by 1
if @b .le. 8 goto nextloop                   ! loop over all 8 loops

! after identifying the problematic loop, next is read through the loop library and rebuild
energy                                       ! system energy
set e0 ?ener
set i 1
label nextframe
open read unit 10 card name ../crd-loop/loop@loop_id.@i.crd ! read loop coordinate
read coor unit 10 card resid
coor orient rms mass sele lpr@loop_id end    ! reorient with respect to the loop
open read unit 10 card name final/@crdnam.crd
read coor unit 10 card resid sele .not. loop@loop_id end ! replace the rest of the complex
back
energy                                       ! evaluate energy
if ?ener .le. @e0 then                       ! check if the new coordinate is better
set d @i                                     ! save trajectory frame number
set e0 ?ener
endif

incr i by 1
if @i .le. 100 goto nextframe
```
